# Supplementary material for: HERVs establish a distinct molecular subtype in stage II/III colorectal cancer with poor outcome
Source: PubMed Central journal article supplement (PMC7884730; doi:10.1038/s41525-021-00177-w), 2021-02-15
Supplement: 41525_2021_177_MOESM1_ESM.pdf [file 41525_2021_177_MOESM1_ESM.pdf]

## Supplementary Fig. 1

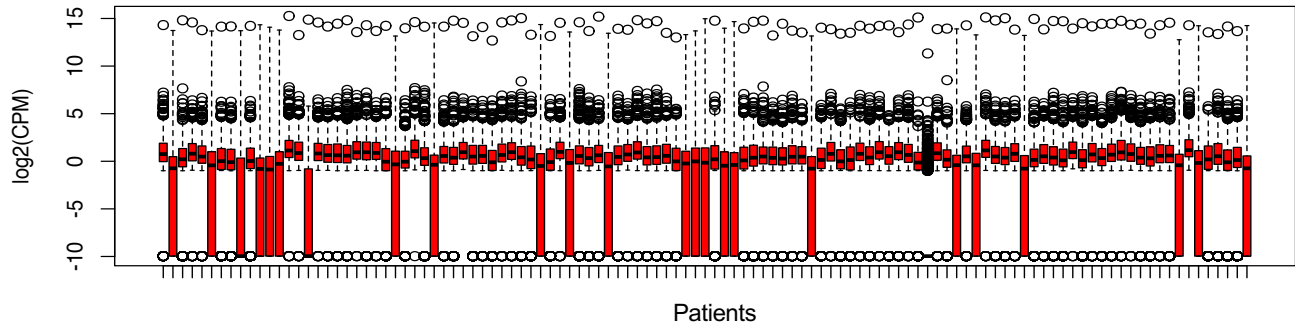

**Distribution of normalized hERV expression across patients.** hERV is constitutively expressed across patients with over-expression in some compared to others.

## Supplementary Fig. 2

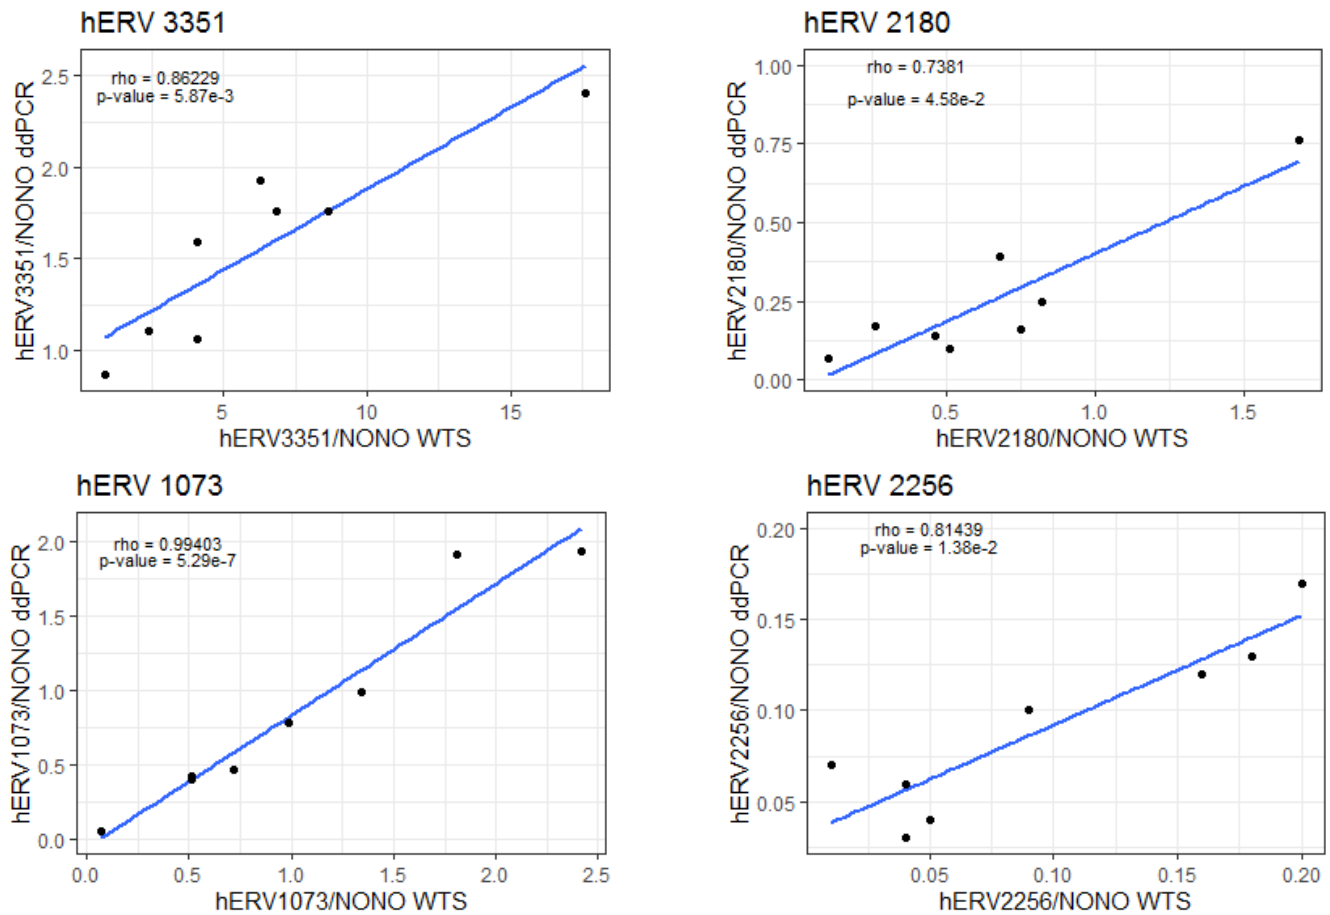

| Sample | WTS Relative Expression |           |           |           | ddPCR Relative Expression |           |           |           |
|--------|-------------------------|-----------|-----------|-----------|---------------------------|-----------|-----------|-----------|
|        | 3351/NONO               | 2180/NONO | 1073/NONO | 2256/NONO | 3351/NONO                 | 2180/NONO | 1073/NONO | 2256/NONO |
| CR719  | 0.87                    | 0.10      | 0.07      | 0.01      | 0.87                      | 0.07      | 0.06      | 0.07      |
| CR725  | 4.08                    | 0.51      | 0.72      | 0.05      | 1.06                      | 0.10      | 0.47      | 0.04      |
| CR735  | 2.39                    | 0.26      | 0.51      | 0.04      | 1.10                      | 0.17      | 0.43      | 0.06      |
| CR366  | 8.67                    | 0.82      | 1.81      | 0.20      | 1.76                      | 0.25      | 1.92      | 0.17      |
| CR355  | 4.08                    | 0.46      | 0.51      | 0.04      | 1.59                      | 0.14      | 0.41      | 0.03      |
| CR798  | 6.83                    | 0.75      | 1.34      | 0.18      | 1.76                      | 0.16      | 0.99      | 0.13      |
| CR245  | 6.31                    | 0.68      | 0.99      | 0.09      | 1.93                      | 0.39      | 0.78      | 0.10      |
| CR407  | 17.63                   | 1.68      | 2.42      | 0.16      | 2.40                      | 0.76      | 1.94      | 0.12      |

**Expression of hERVs confirmed by ddPCR.** Four hERVs were selected for confirmation of expression by ddPCR. HERV expression relative to NONO gene expression was confirmed in 8 samples ranging from low to high expression in the cohort. Spearman rho and p-values confirm significant correlation between whole transcriptome and ddPCR relative expression.

### Supplementary Fig. 3

| <b>R<sup>2</sup> values</b> |                    | <b>FRICION</b> |            |             |
|-----------------------------|--------------------|----------------|------------|-------------|
|                             | <b>% Titration</b> | <b>CD8</b>     | <b>CD4</b> | <b>CD19</b> |
| Colon #1                    | 0-5%               | 0.97           | 0.96       | 0.95        |
| Colon #2                    | 0-5%               | 0.96           | 0.96       | 0.98        |
| Colon #3                    | 0-5%               | 0.88           | 0.80       | 0.77        |
| Colon #4                    | 0-5%               | 0.94           | 0.96       | 0.98        |
| Kidney                      | 0-10%              | 0.94           | 0.99       | 0.97        |
| Pancreas                    | 0-10%              | 0.88           | 0.97       | 0.99        |
| Ovary                       | 0-10%              | 0.87           | 0.99       | 0.97        |
| Rectum                      | 0-10%              | 0.97           | 0.99       | 0.99        |
| Uterus                      | 0-5%               | 0.93           | 0.98       | 0.99        |
| Esophagus                   | 0-5%               | 0.90           | 0.99       | 0.97        |
| Thyroid                     | 0-5%               | 0.93           | 0.98       | 0.99        |
| Bladder                     | 0-5%               | 0.60           | 0.98       | 0.97        |

**FRICION benchmarking results.** Immune cell deconvolution predictions are in good agreement with the percentage titration of immune cells across several cancer types. Colon #1-4 are four different colon tumor samples.

## Supplementary Fig. 4

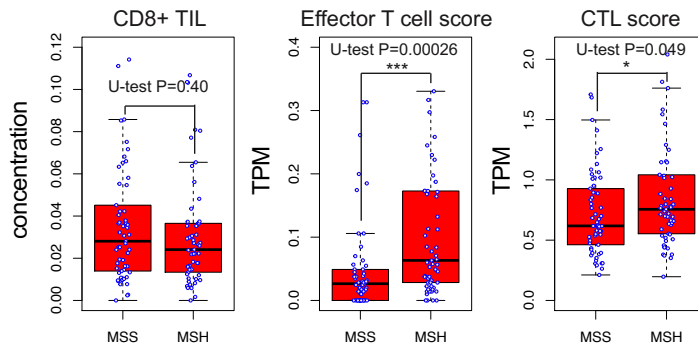

**Association between MSI and immune activity.** MSI status was associated with CTL score ( $\sqrt{PRF \times GZMB}$ ) and effector T cell score ( $\sqrt{EOMES \times \gamma IFN}$ ) but not CD8+ concentrations.

## Supplementary Fig. 5

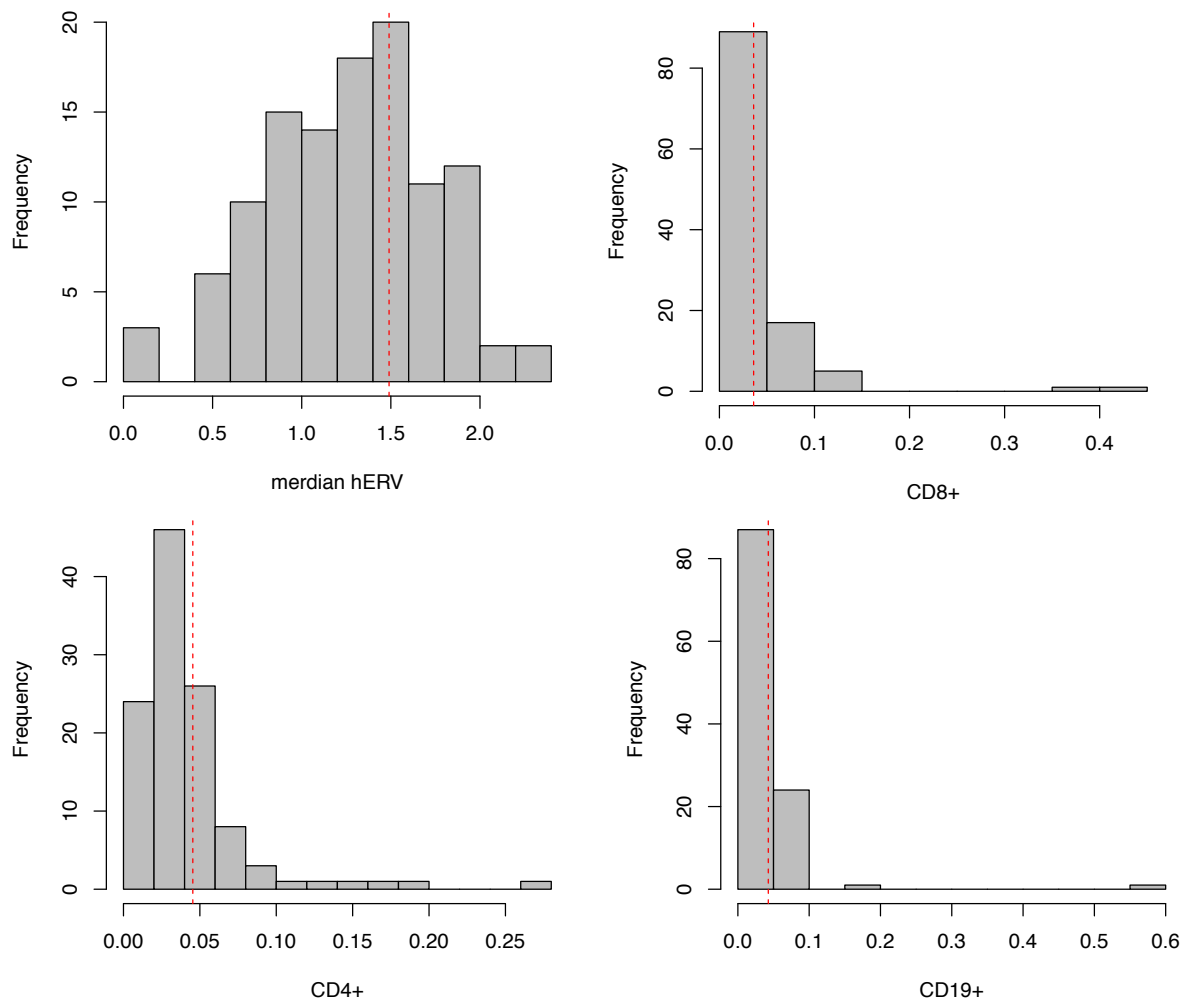

**Discretization of continuous biomarkers.** We set the threshold as the top 30% of the distribution of each variable. Patients with higher than the threshold values are defined as high and vice versa.

# Supplementary Fig. 6

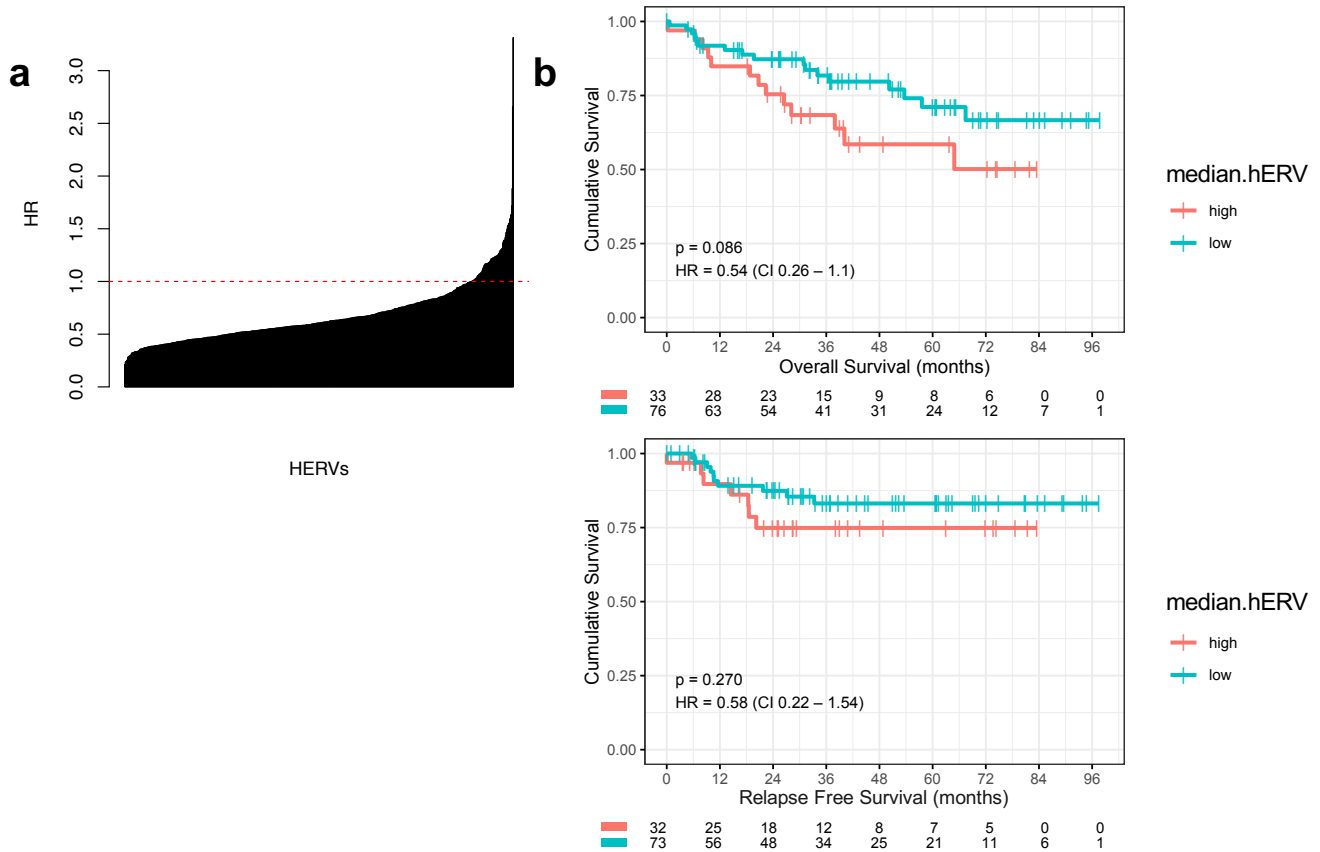

**Distribution HRs of each hERV using OS as end point. a**, Most hERVs are capable of stratifying patients' prognosis. **b**, Kaplan-Meier curves of OS and RFS median.hERV<sup>high</sup> and median.hERV<sup>low</sup> groups.

# Supplementary Fig. 7

**a**

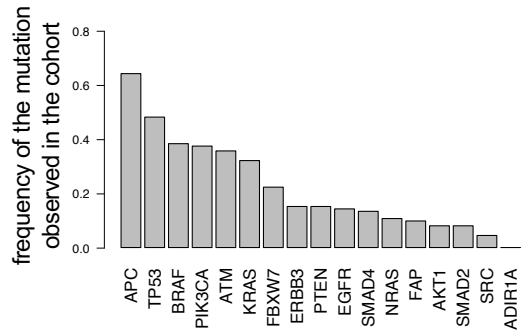

**b**

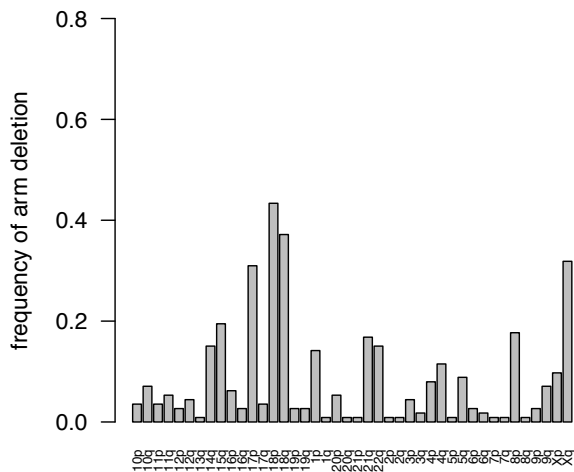

**c**

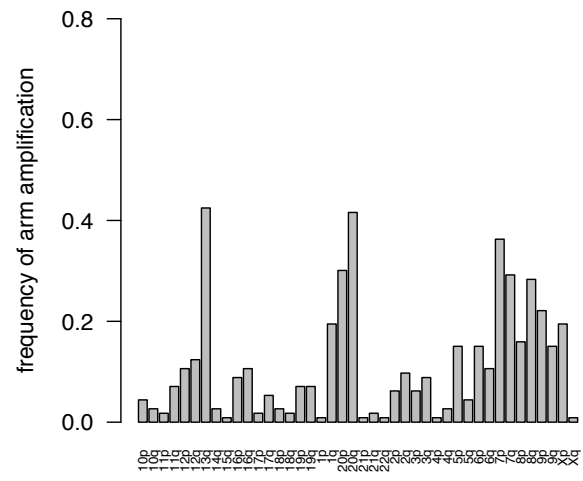

**d**

gene deletion

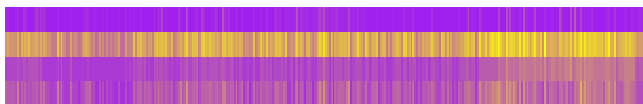

**e**

gene amplification

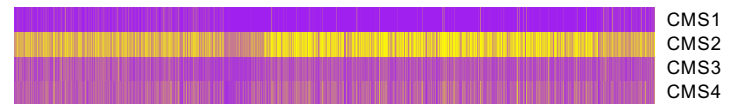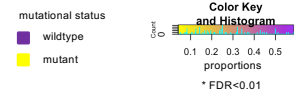

**Summary of genomic features of the cohort.** **a**, frequency of driver mutations. **b** and **c**, frequency of arm deletions and amplifications. **d** and **e**, enrichment of gene deletion and amplification events of CRC patients in each CMS.

# Supplementary Fig. 8

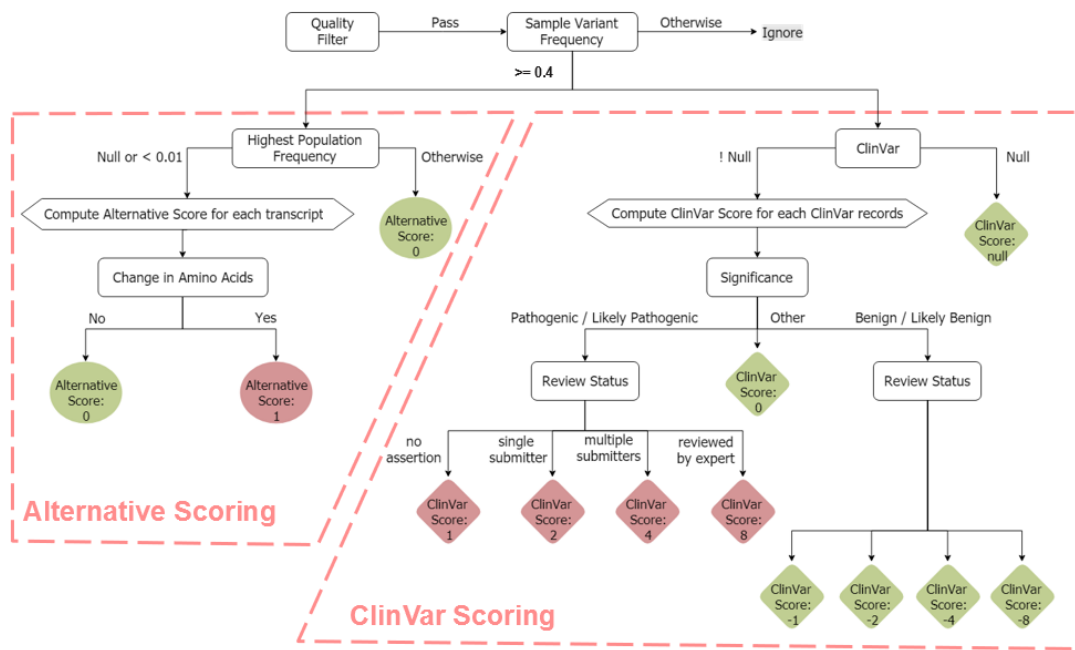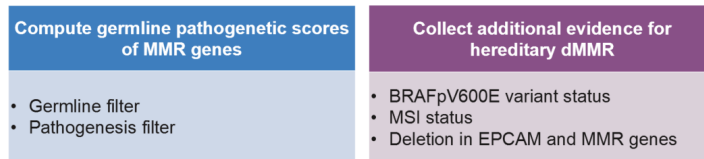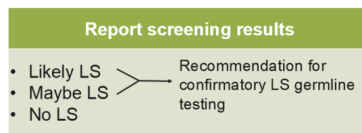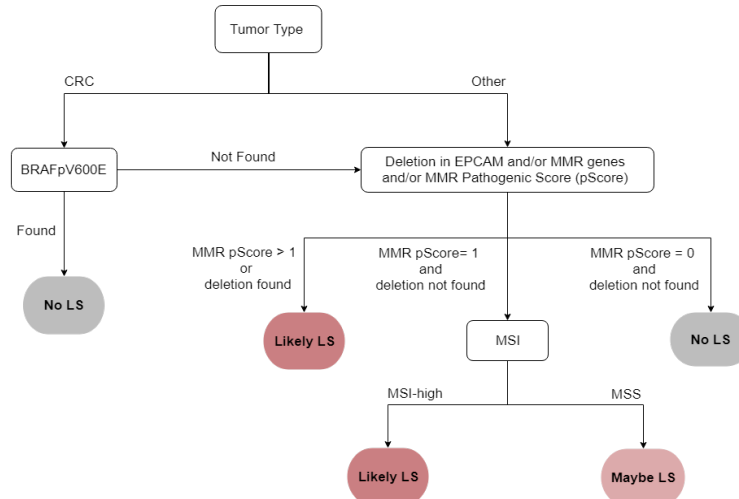

**Lynch syndrome identification algorithm using TSO500 assay.**



## Supplementary Fig. 9

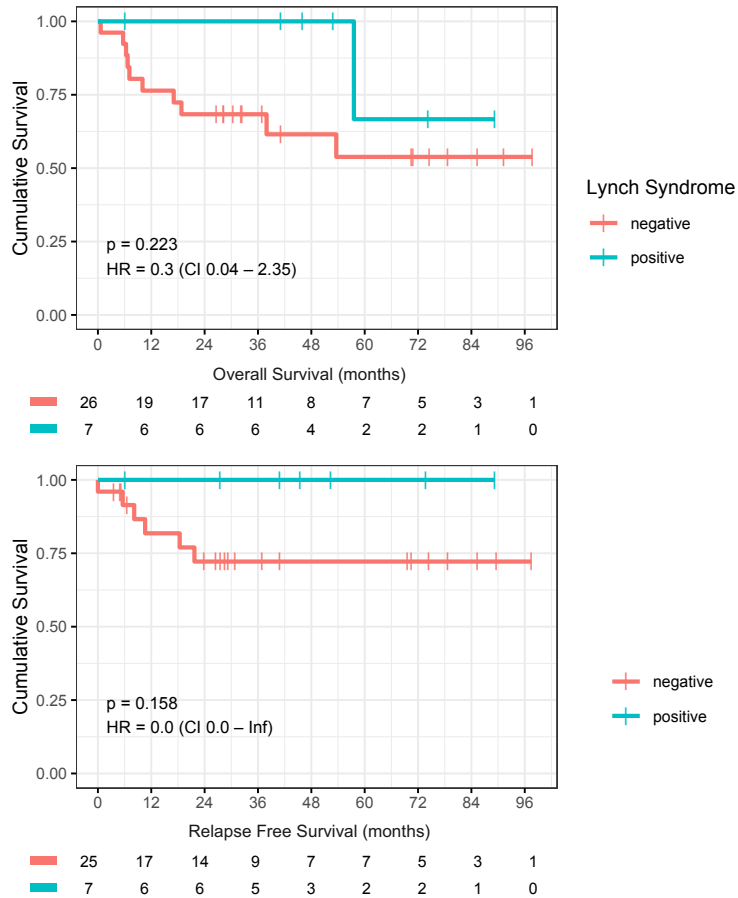

**Survival analysis using Lynch syndrome status as the predictive variable.** Patients with LS tend to confer favorable response compared to others. End points: OS and RFS.

## Supplementary Fig. 10

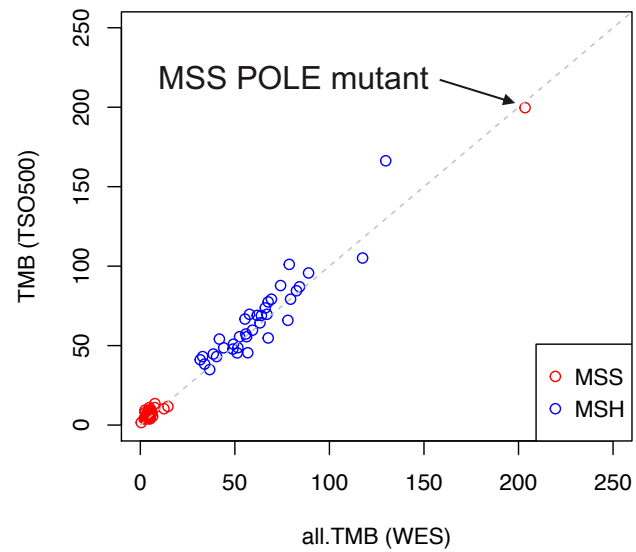

**High concordance between TMB and MSI measurements through TSO500 and WES.** With the exception of one POLE mutant patient, all MSS patients had low TMB and vice versa.

# Supplementary Fig. 11

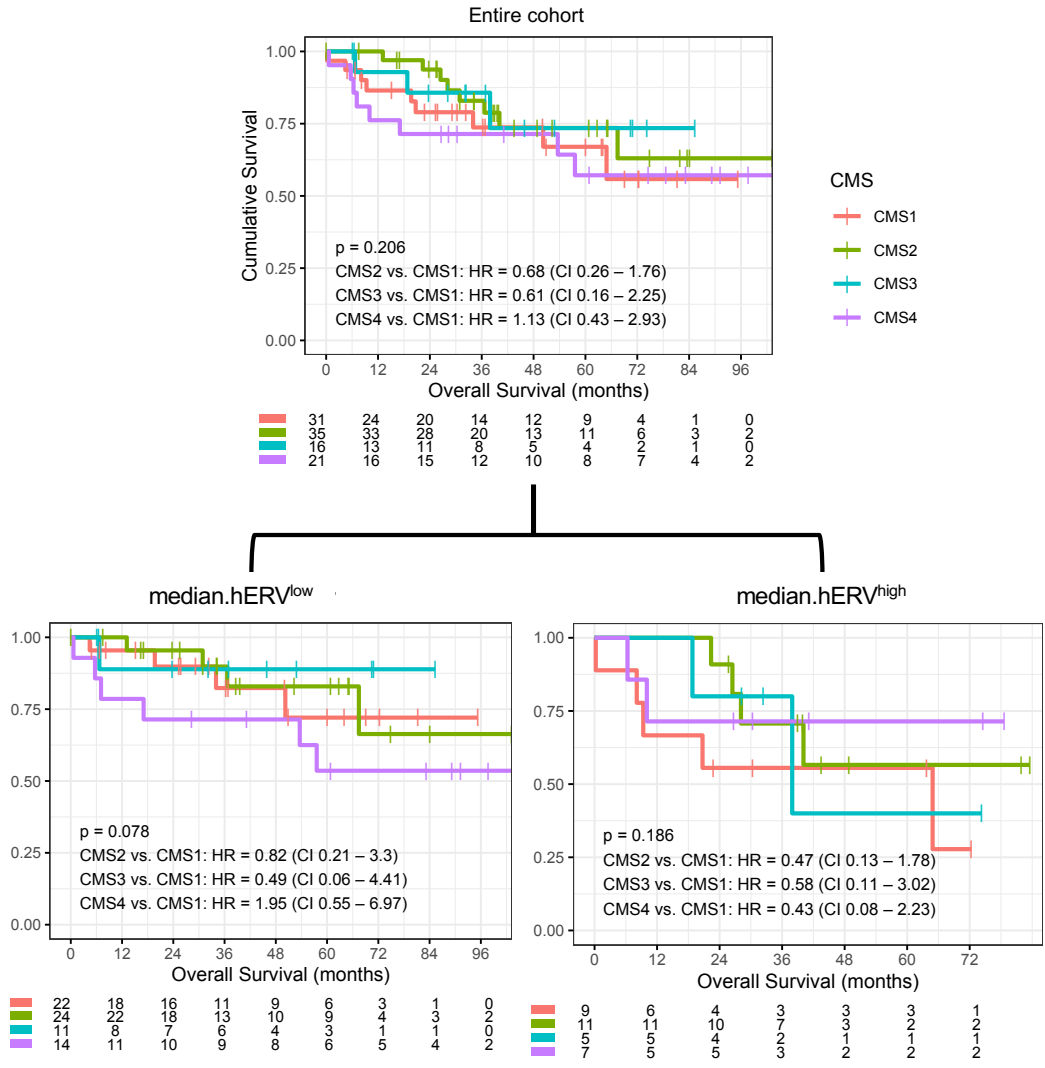

**Kaplan-Meier curves of OS for each group are shown. Incorporation of median.hERV into CMS classification boosts the predictive power CMS (log-rank P values are shown).**

## Supplementary Fig. 12

**median.hERV over 100 rounds  
of randomly downsampling of  
831 hERV loci to 80% (665) of loci**

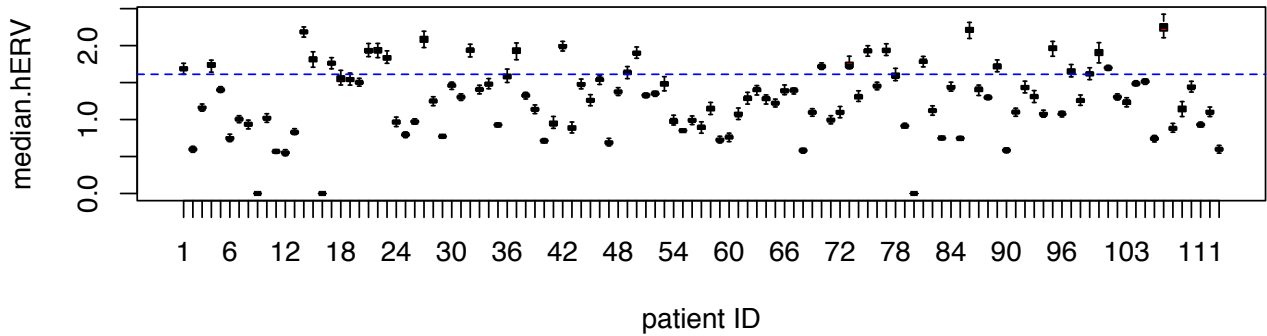

**median.hERV is a robust biomarker to noise and missed hERV loci.** Boxplots demonstrates only a small variation of median.hERV over 100 rounds of sampling of hERV loci down to only 80% of the originally curated reference.

## Supplementary Data Legends

**Supplementary Data 1:** summary of WTS assay sequencing analysis metrics

**Supplementary Data 2:** summary of WES assay sequencing analysis metrics

**Supplementary Data 3:** normalized hERV expression for each patient

**Supplementary Data 4:** tumor infiltrating lymphocytes estimations

**Supplementary Data 5:** normalized gene expression values (TPM) for each patient

**Supplementary Data 6:** summary of all features used for survival analysis

**Supplementary Data 7:** summary of TSO500 assay sequencing analysis data

**Supplementary Data 8:** correlation between immune check point molecules and median.hERV across patients.

**Supplementary Data 9:** summary of all genomic and transcriptomic features included in this study for all patients.
